# Supplementary material for: Scaling Up Science-Based Care for Depression and Unhealthy Alcohol Use in Colombia: An Implementation Science Project
Source: Atypon-hosted journal article supplement (doi:10.1176/appi.ps.202000041), 2021-08-04
Supplement: appi.ps.202000041.ds001.pdf [file appi.ps.202000041.ds001.pdf]

Figure 1.

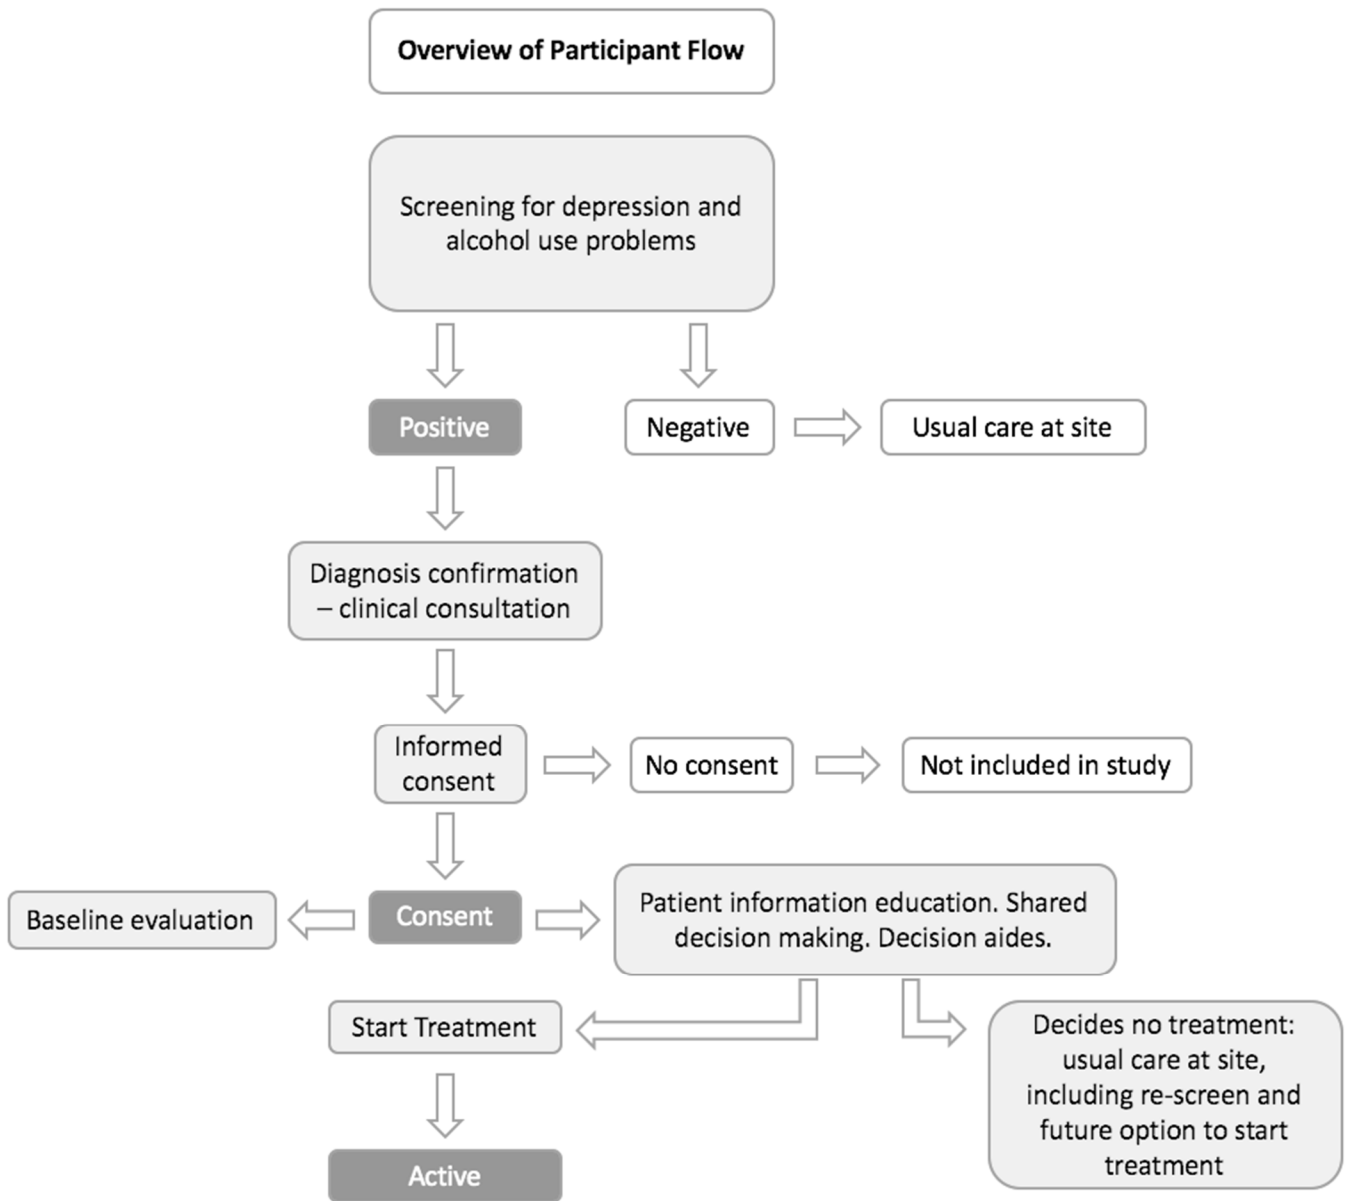

**Figure 2. Flow of Data Collection on Study Measures Within Each Site**

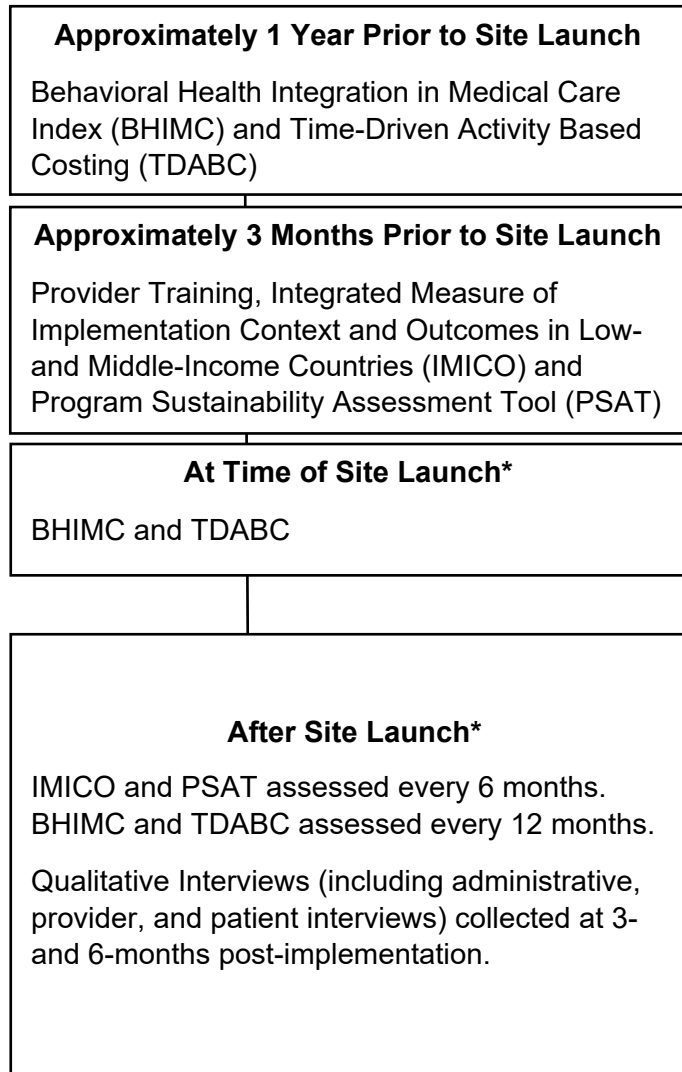

\*Patient measures are collected at the time they joined the study and every three months thereafter for a period of 12 months (5 time points). Measures include: Patient Health Questionnaire-8 (PHQ-8), Quick Drinking Screen (QDS), WHO Disability Assessment (WHODAS), Generalized Anxiety Disorder Screener-7 (GAD-7), Non-study Medical and Other Services (NSMOS/NMED). Health and Work Performance Questionnaire (HPQ) is collected every 6 months. IMICO is collected every 6 months.
